# Supplementary material for: Activated Tumor-infiltrating Fibroblasts Predict Worse Prognosis in Breast Cancer Patients
Source: PubMed Central journal article supplement — J Cancer. 2018 Sep 8;9(20):3736–42. doi: 10.7150/jca.28054 (PMC6216016; doi:10.7150/jca.28054), 2018-09-08
Supplement: jcav09p3736s1.pdf [file jcav09p3736s1.pdf]

## Supplementary data

### Activated Tumor-infiltrating Fibroblasts Predict Worse Prognosis in Breast Cancer Patients

Guoming Hu <sup>1,\*</sup>, Feng Xu<sup>1</sup>, Kefang zhong <sup>1</sup>, Shimin Wang <sup>2</sup>, Liming Huang <sup>1,\*</sup>, Wei Chen <sup>1,\*</sup>

<sup>1</sup> Department of General Surgery (Breast and Thyroid Surgery), <sup>2</sup> Department of Nephrology, Shaoxing People's Hospital; Shaoxing Hospital, Zhejiang University School of Medicine, 312000, Zhejiang, China.

#### \* Correspondence:

Guoming Hu: *E-mail: hgmpj@126.com;*

Liming Huang: *E-mail: shaoxinglm@126.com;*

Wei Chen: *E-mail: cwzjsx5018@163.com.*

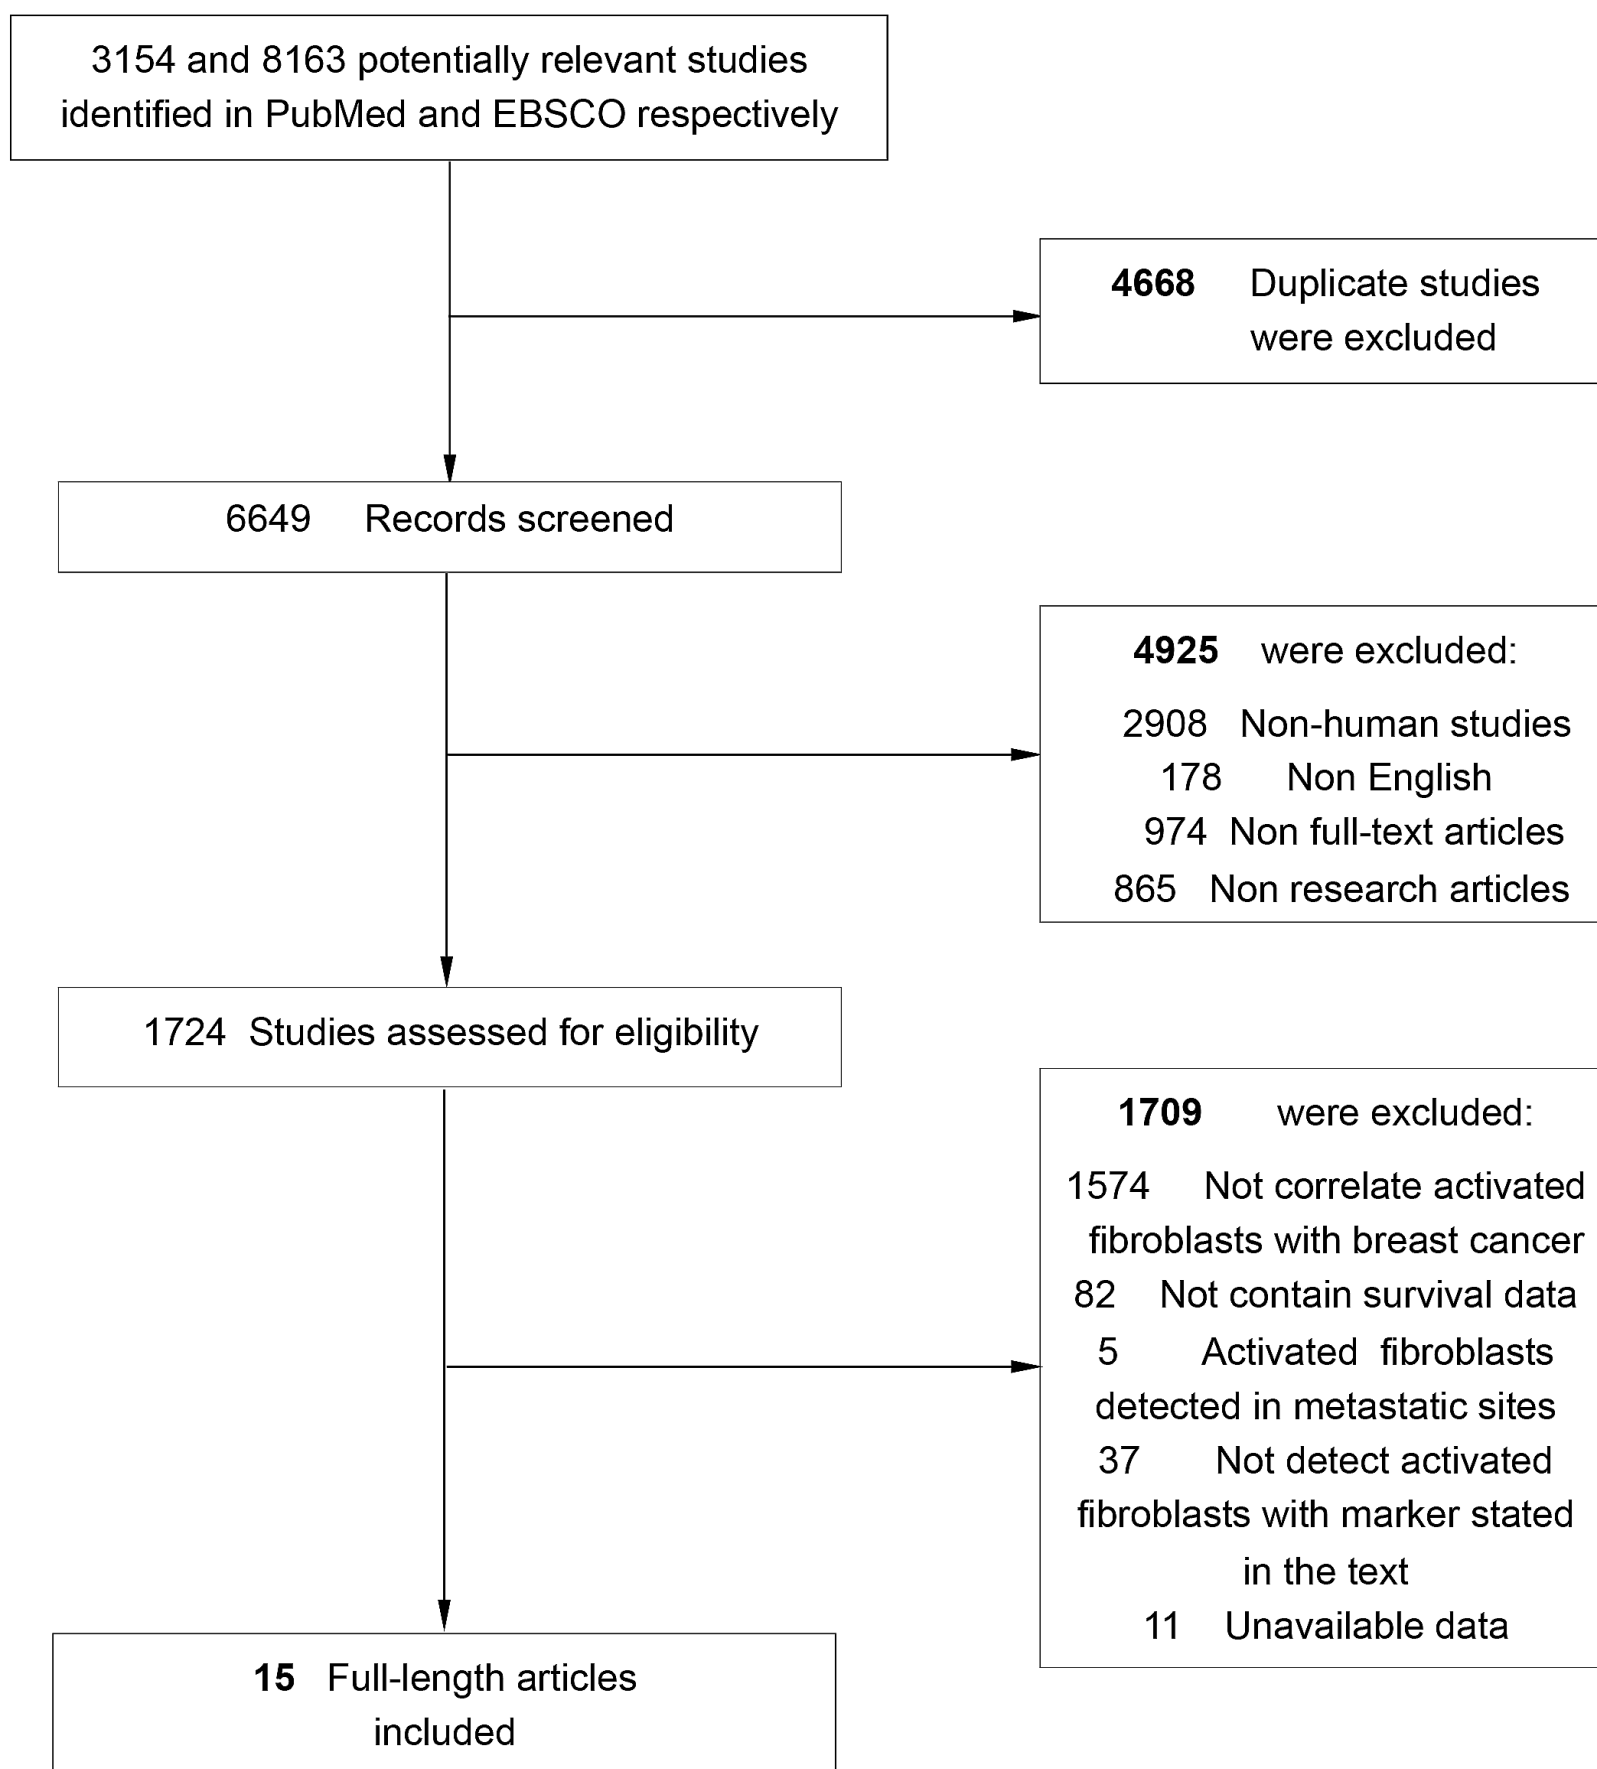

**Fig. S1.** Flow chart diagram of study selection.

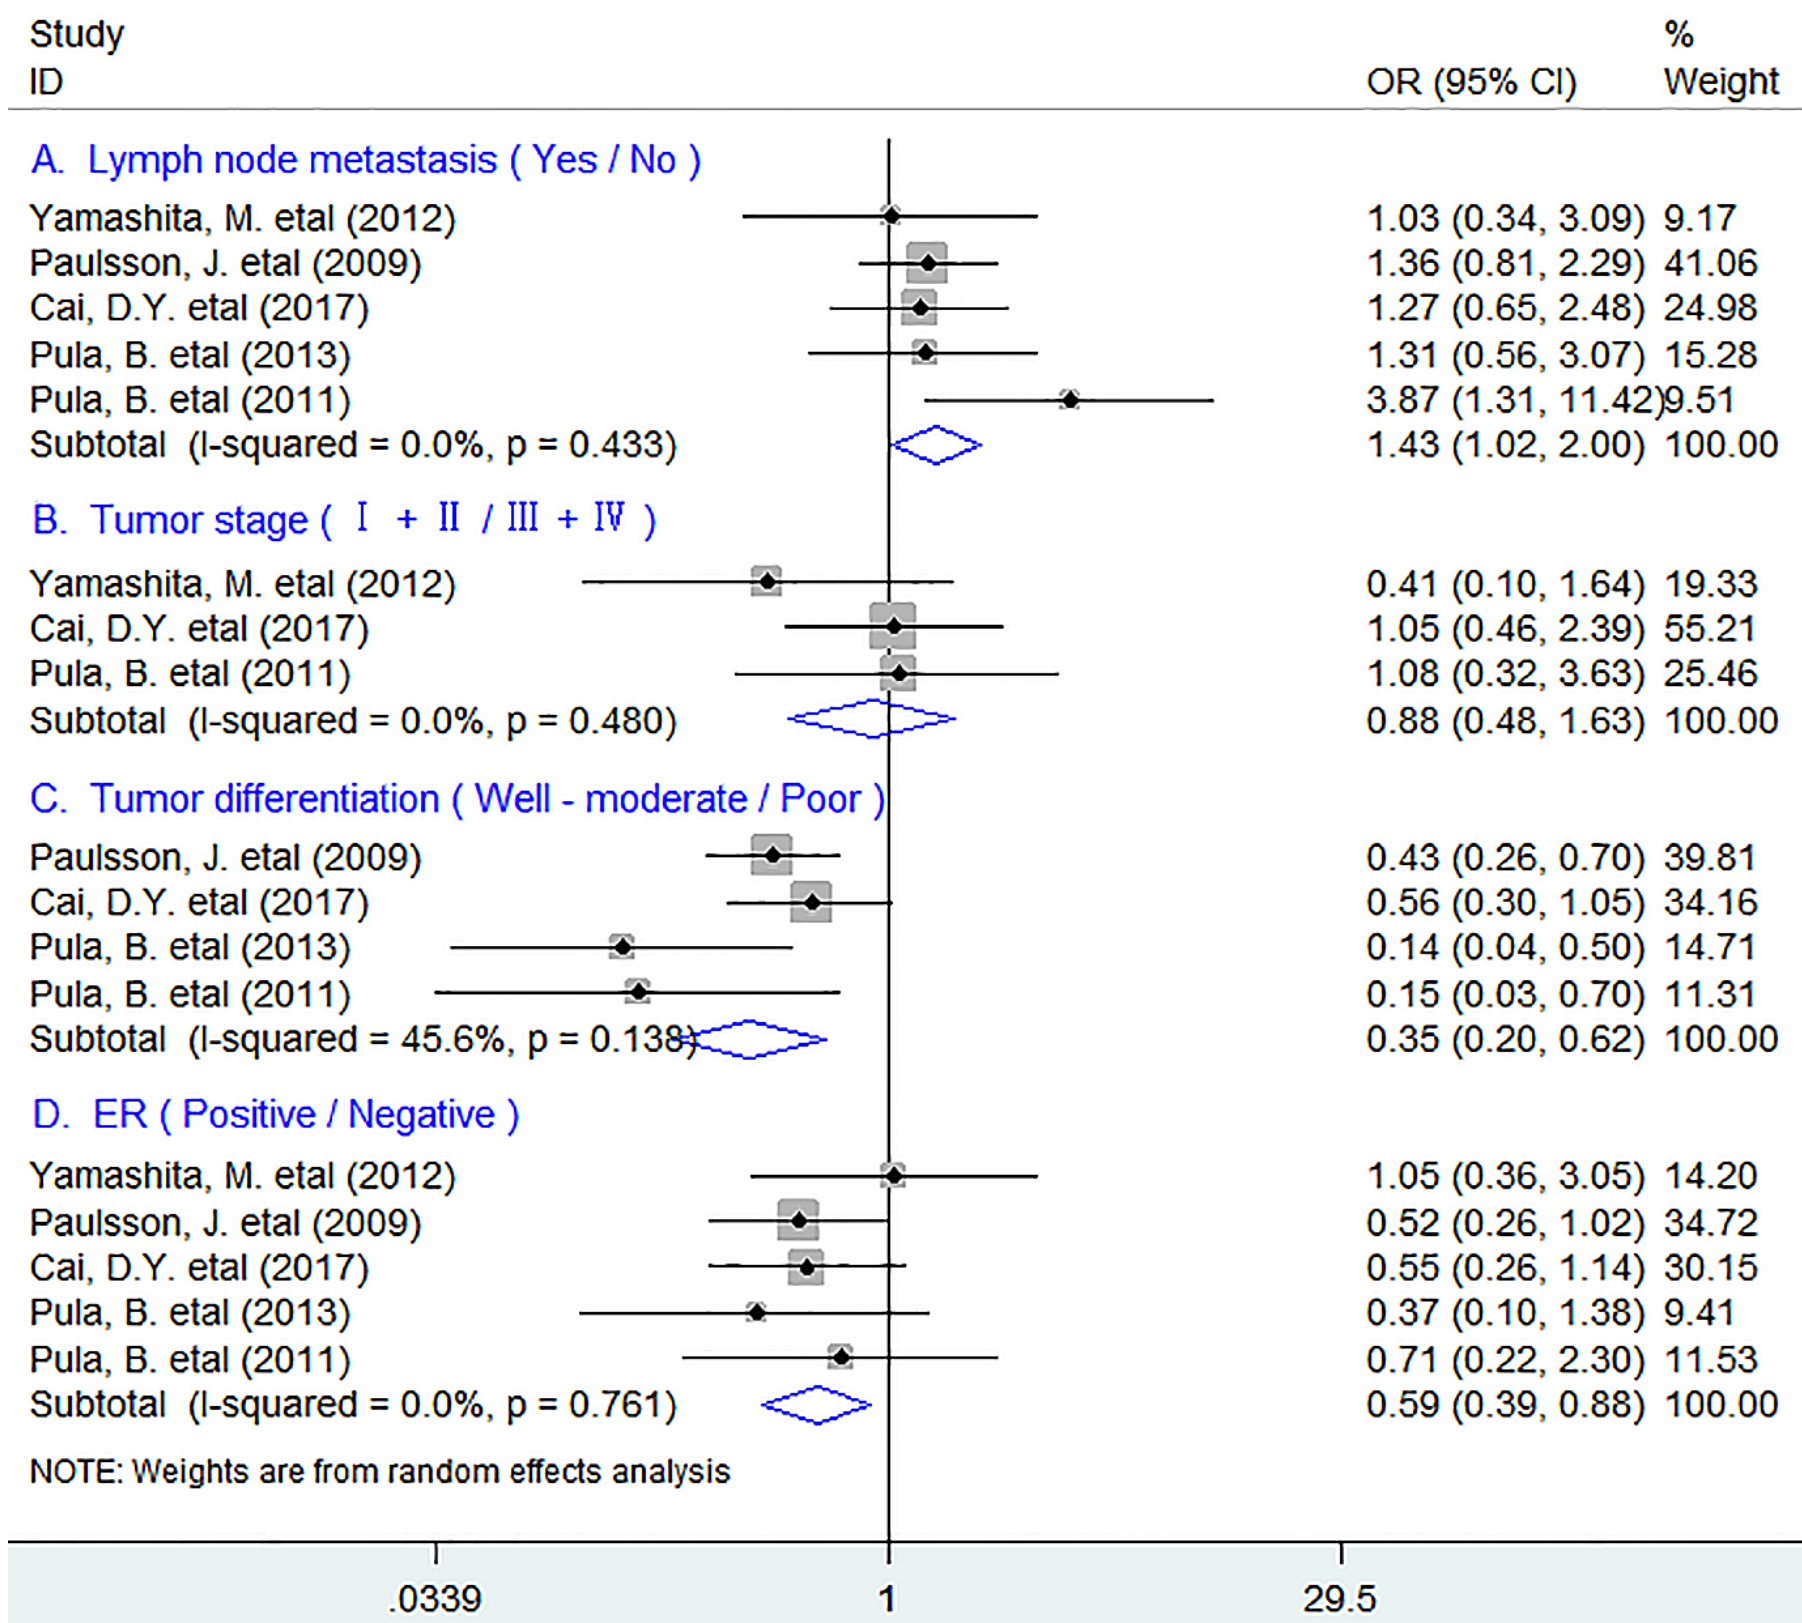

**Fig. S2.** Forest plots indicating ORs of the association between activated fibroblast infiltration and clinicopathological features such as lymph node metastasis etc of breast cancer.

**Table S1.** Characteristics of the included studies for OR analysis of clinicopathological features.

| Study                   | Year | Tumor type             | No. of Patients | Activated fibroblast density: H / L | Lymph node metastasis (Yes / No) | Tumor stage (I+II / III+IV) | Tumor Differentiation (Well-moderate/poor) | ER (P / N)               |
|-------------------------|------|------------------------|-----------------|-------------------------------------|----------------------------------|-----------------------------|--------------------------------------------|--------------------------|
| Yamashita, M. etal [11] | 2012 | Invasive breast cancer | 60              | 25/35                               | H:(8/17);<br>L:(11/24)           | H:(19/6);<br>L:(31/4)       | NR                                         | H:(16/9);<br>L:(22/13)   |
| Paulsson, J. etal [18]  | 2009 | Invasive breast cancer | 289             | 100/189                             | H:(39/53);<br>L:(59/109)         | NR                          | H:(52/48); L:(135/53)                      | H:(81/19);<br>L:(165/20) |
| Cai, D.Y. etal [24]     | 2017 | Invasive breast cancer | 164             | 72/92                               | H:(24/48);<br>L:(26/66)          | H:(60/12);<br>L:(76/16)     | H:(32/40); L:(54/38)                       | H:(51/21);<br>L:(75/17)  |
| Pula, B. etal [21]      | 2013 | Invasive breast cancer | 104             | 74/30                               | H:(37/37);<br>L:(13/17)          | NR                          | H:(41/33); L:(27/3)                        | H:(57/17);<br>L:(27/3)   |
| Pula, B. etal [23]      | 2011 | Invasive breast cancer | 117             | 96/21                               | H:(52/43);<br>L:(5/16)           | H:(78/16);<br>L:(18/4)      | H:(57/39); L:(19/2)                        | H:(72/24);<br>L:(17/4)   |

H: high; L: low; NR: not reported; P: positive; N: negative; ER: estrogen receptor
